# Supplementary material
Source: PubMed Central journal article supplement (PMC7965923)
Supplement: 4080_table.pdf [file 4080_table.pdf]

**On-line Table: Diagnoses and MRI features in 23 patients with clinical presentation of peripheral neuropathy or plexopathy**

| Nerve or Plexus Lesions Suspicious for Tumor                                                                                                                                                                                                   | Conventional Imaging Features <sup>a</sup> |                |
|------------------------------------------------------------------------------------------------------------------------------------------------------------------------------------------------------------------------------------------------|--------------------------------------------|----------------|
|                                                                                                                                                                                                                                                | No. of Patients                            | T2 Enhancement |
| Group 1: Benign tumors<br>Primary nerve sheath tumor, benign Schwannoma <sup>b</sup>                                                                                                                                                           | 4                                          | +              |
|                                                                                                                                                                                                                                                |                                            | +              |
|                                                                                                                                                                                                                                                |                                            | +              |
|                                                                                                                                                                                                                                                |                                            | +              |
| Neurofibroma <sup>b</sup>                                                                                                                                                                                                                      | 1                                          | +              |
|                                                                                                                                                                                                                                                |                                            | +              |
| Mass with MRI features of nerve sheath tumor and long-term stability with no progressive symptoms <sup>c</sup>                                                                                                                                 | 5                                          | +              |
|                                                                                                                                                                                                                                                |                                            | +              |
|                                                                                                                                                                                                                                                |                                            | +              |
|                                                                                                                                                                                                                                                |                                            | +              |
|                                                                                                                                                                                                                                                |                                            | +              |
|                                                                                                                                                                                                                                                |                                            | +              |
| Group 2: Malignant tumors<br>Primary nerve sheath tumor, malignant<br>Malignant peripheral nerve sheath tumor <sup>b</sup>                                                                                                                     | 1                                          | ±              |
| Metastatic disease and lymphoma/leukemia<br>Acute lymphoblastic leukemia <sup>c</sup><br>Rhabdomyosarcoma <sup>b</sup>                                                                                                                         | 1                                          | +              |
|                                                                                                                                                                                                                                                |                                            | +              |
| Metastatic breast cancer, brachial <sup>b</sup> or lumbosacra <sup>c</sup> plexus                                                                                                                                                              | 2                                          | +              |
|                                                                                                                                                                                                                                                |                                            | +              |
| Metastatic renal cell carcinoma <sup>b</sup>                                                                                                                                                                                                   | 1                                          | +              |
|                                                                                                                                                                                                                                                |                                            | +              |
| Diffuse large B-cell lymphoma <sup>b</sup>                                                                                                                                                                                                     | 1                                          | +              |
| Group 3: Postirradiation changes<br>Postirradiation brachial or lumbosacral plexopathy following radiation for prior breast cancer (n = 3), sarcoma (n = 1), oral squamous cell carcinoma (n = 1), and Hodgkin lymphoma (n = 1) <sup>c,d</sup> | 6                                          | +              |
|                                                                                                                                                                                                                                                |                                            | ±              |
|                                                                                                                                                                                                                                                |                                            | +              |
|                                                                                                                                                                                                                                                |                                            | +              |
|                                                                                                                                                                                                                                                |                                            | +              |
|                                                                                                                                                                                                                                                |                                            | +              |

**Note:**—+ indicates predominantly homogeneous enhancement ("Enhancement" column); ±, presence of both enhancing and nonenhancing areas; —, no enhancement. All lesions were nearly T1 isointense to muscle tissue.

<sup>a</sup> Biopsy-proven.

<sup>b</sup> Presumptive diagnosis for nonbiopsy-proven lesions was made through long-term clinical and imaging follow-up (n = 10; mean follow-up, 40 ± 31 months) or intermediate-term follow-up supplemented by PET, neurological exam, and/or nerve conduction studies (n = 3; mean follow-up, 4 ± 1 months).

<sup>c</sup> Mean time from radiation therapy to clinical presentation was 4.5 years; range, 5 months to 12 years.
